# Supplementary material for: Implementation of Steps 1–9 to Successful Breastfeeding Reduces the Frequency of Mild and Severe Episodes of Diarrhea and Respiratory Tract Infection Among 0–6 Month Infants in Democratic Republic of Congo
Source: Springer Nature journal article supplement (doi:10.1007/s10995-018-2446-9), 2018-02-07
Supplement: MOESM1 [file 15445442]

**Implementation of Steps 1-9 to Successful Breastfeeding reduces the frequency of mild and severe episodes of diarrhea and respiratory tract infection among 0-6 month infants in Democratic Republic of Congo**

Maternal and Child Health Journal

Paul Zivich, MPH a, Bruno Lapika, PhD b, Frieda Behets, PhD c,d, Marcel Yotebieng, MD, MPH, PhD a

a The Ohio State University, College of Public Health, Division of Epidemiology, Columbus, OH

b The University of Kinshasa, Department of Anthropology, Kinshasa, DR Congo

c The University of North Carolina at Chapel Hill, Department of Epidemiology, Chapel Hill, NC

d The University of North Carolina at Chapel Hill, School of Medicine, Chapel Hill, NC

**Corresponding Author:** Paul Zivich (zivich.5@gmail.com)

**Supplement 1:** Sensitivity analysis of effect of implementing steps 1-9, or steps 1-10 on episodes of diarrhea and respiratory infections*

|  |  | Steps 1-9 group |  | Steps 1-10 group |
| --- | --- | --- | --- | --- |
|  |  | IRR (95% CI) † |  | IRR (95% CI) † |
| Diarrhea | |  |  |  |
|  | Crude IRR (95%CI) | 0.80 (0.61, 1.05) |  | 1.13 (0.88, 1.46) |
|  | Adjusted IRR (95%CI) ‡ | 0.81 (0.62, 1.08) |  | 1.15 (0.88, 1.51) |
| Diarrhea & health facility care | |  |  |  |
|  | Crude IRR (95%CI) | 0.71 (0.53, 0.95) |  | 0.74 (0.55, 1.00) |
|  | Adjusted IRR (95%CI) ‡ | 0.70 (0.52, 0.94) |  | 0.74 (0.54, 1.02) |
| Diarrheal hospitalization | |  |  |  |
|  | Crude IRR (95%CI) | 0.83 (0.52, 1.33) |  | 0.48 (0.27, 0.86) |
|  | Adjusted IRR (95%CI) ‡ | 0.86 (0.53, 1.39) |  | 0.45 (0.23, 0.85) |
| Respiratory | |  |  |  |
|  | Crude IRR (95%CI) | 0.56 (0.45, 0.72) |  | 0.75 (0.06, 0.94) |
|  | Adjusted IRR (95%CI) ‡ | 0.56 (0.44, 0.72) |  | 0.77 (0.61, 0.97) |
| Respiratory Health Facility care | |  |  |  |
|  | Crude IRR (95%CI) | 0.56 (0.44, 0.72) |  | 0.74 (0.58, 0.93) |
|  | Adjusted IRR (95%CI) ‡ | 0.56 (0.43, 0.71) |  | 0.74 (0.58, 0.95) |
| Respiratory Hospitalization | |  |  |  |
|  | Crude IRR (95%CI) | 0.85 (0.53, 1.37) |  | 0.60 (0.34, 1.06) |
|  | Adjusted IRR (95%CI) ‡ | 0.90 (0.56, 1.46) |  | 0.61 (0.33, 1.11) |

IRR = incidence rate ratio; 95%CI = 95% Confidence interval;

*In the sensitivity analysis, all infants whose mothers were loss to follow-up were considered to have the outcome of interest.

†For all 95% CIs, generalized estimating equations were used to account for clustering at the clinic level. IRR were estimated using piecewise exponential Poisson models with intervals between study visits as categorical time variable.

‡Adjusted for SES, pregnancy plans, education, previous child death, categorical time interval.
